# Supplementary material for: Metabolic Engineering of Pichia pastoris for the Production of Triacetic Acid Lactone
Source: MDPI journal article supplement (doi:10.3390/jof9040494), 2023-04-20
Supplement: s1 [file s1]

## Supplementary Figures

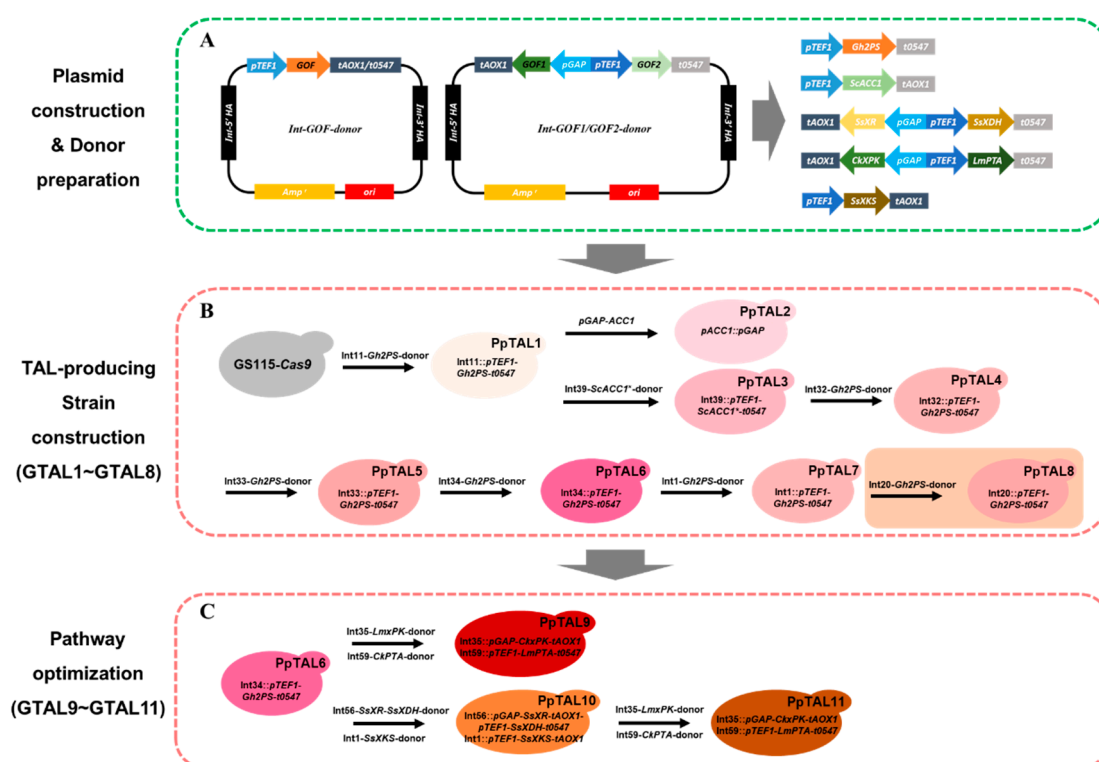

**Figure S1.** Schematic diagram of plasmid and strain construction in this study. (A) Schematic diagram of gene integration expression cassette and plasmid construction. (B) Schematic diagram of TAL-producing strains construction. (C) Schematic diagram of the pathway optimization strain construction for enhanced acetyl-CoA synthesis and/or xylose utilization.

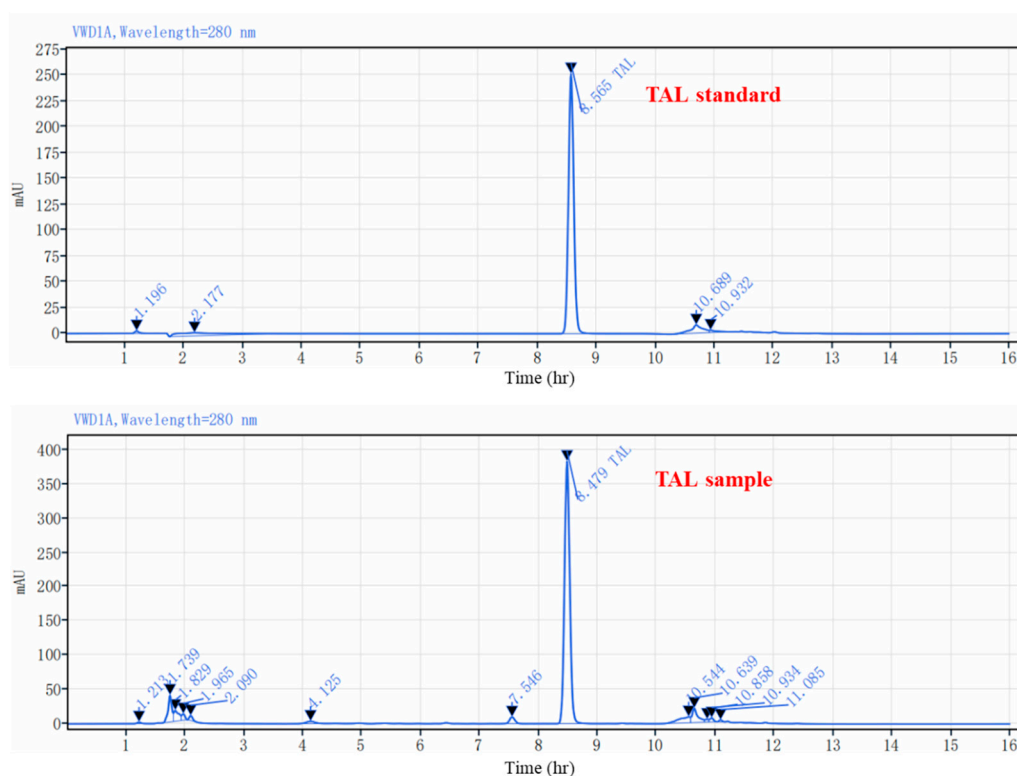

**Figure S2.** HPLC analysis for the identification and quantification of TAL. The peak corresponding to TAL was observed at ~8.50 min.

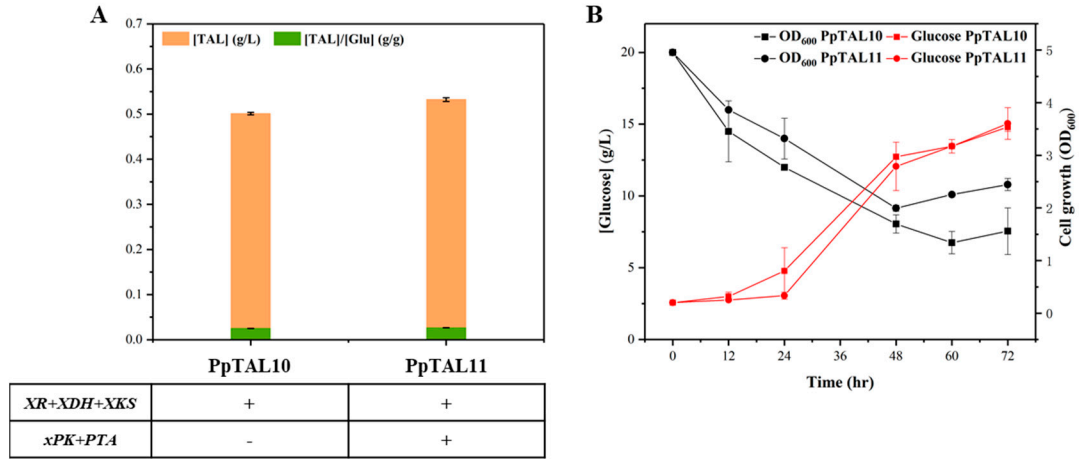

**Figure S3.** TAL production from glucose. (A) Comparison of TAL titer of the xylose utilization strain with or without the PK pathway in SCD medium. (B) Glucose consumption and cell growth profiles of PpTAL10 and PpTAL11 in SCD medium. The data represent three biological replicates and the error bars represent standard deviations.

## Supplementary Tables

**Table S1. List of Plasmids Used in This Study.**

| Name             | Genotype                                                    | Description                                                                                                                                                           |
|------------------|-------------------------------------------------------------|-----------------------------------------------------------------------------------------------------------------------------------------------------------------------|
| HZP-gRNA-Int1    | PARS1, zeocin, <i>pSER</i> , Int1                           | The sgRNA helper plasmids                                                                                                                                             |
| HZP-gRNA-Int11   | PARS1, zeocin, <i>pSER</i> , Int11                          |                                                                                                                                                                       |
| HZP-gRNA-Int20   | PARS1, zeocin, <i>pSER</i> , Int20                          |                                                                                                                                                                       |
| HZP-gRNA-Int32   | PARS1, zeocin, <i>pSER</i> , Int32                          |                                                                                                                                                                       |
| HZP-gRNA-Int33   | PARS1, zeocin, <i>pSER</i> , Int33                          |                                                                                                                                                                       |
| HZP-gRNA-Int34   | PARS1, zeocin, <i>pSER</i> , Int34                          |                                                                                                                                                                       |
| HZP-gRNA-Int35   | PARS1, hygromycin B, <i>pSER</i> , Int35                    |                                                                                                                                                                       |
| HZP-gRNA-Int39   | PARS1, zeocin, <i>pSER</i> , Int39                          |                                                                                                                                                                       |
| HZP-gRNA-Int56   | PARS1, zeocin, <i>pSER</i> , Int56                          |                                                                                                                                                                       |
| HZP-gRNA-Int59   | PARS1, zeocin, <i>pSER</i> , Int59                          |                                                                                                                                                                       |
| HZP-gRNA-DetPFK1 | PARS1, zeocin, <i>pSER</i> , DetPFK1                        |                                                                                                                                                                       |
| HZP-gRNA-DetPYK1 | PARS1, zeocin, <i>pSER</i> , DetPYK1                        |                                                                                                                                                                       |
| Int1-donor       | Amp, Int1- <i>pTEF1-HindIII-Nde I</i> - <i>t0547</i>        | The integration donor helper plasmids containing an upstream and a downstream homologous arm of ~500 bp as well as the restriction sites for genes or genes cassettes |
| Int11-donor      | Amp, Int11- <i>pTEF1-HindIII-Nde I</i> - <i>t0547</i>       |                                                                                                                                                                       |
| Int20-donor      | Amp, Int20- <i>pTEF1-HindIII-Nde I</i> - <i>t0547</i>       |                                                                                                                                                                       |
| Int32-donor      | Amp, Int32- <i>pTEF1-HindIII-Nde I</i> - <i>t0547</i>       |                                                                                                                                                                       |
| Int33-donor      | Amp, Int33- <i>pTEF1-HindIII-Nde I</i> - <i>t0547</i>       |                                                                                                                                                                       |
| Int34-donor      | Amp, Int34- <i>pTEF1-HindIII-Nde I</i> - <i>t0547</i>       |                                                                                                                                                                       |
| Int35-donor      | Amp, Int35- <i>pGAP-Ava I</i> - <i>BglII</i> - <i>tAOX1</i> |                                                                                                                                                                       |
| Int39-donor      | Amp, Int39- <i>pTEF1-HindIII-Nde I</i> - <i>tAOX1</i>       |                                                                                                                                                                       |

|                        |                                                                         |                                                                                                      |
|------------------------|-------------------------------------------------------------------------|------------------------------------------------------------------------------------------------------|
| Int56-donor            | Amp, Int56- <i>pTEF1-HindIII-Nde I -t0547-pGAP-Ava I -Bgl II -tAOX1</i> |                                                                                                      |
| Int1-donor             | Amp, Int1- <i>pTEF1-HindIII-Nde I -tAOX1</i>                            |                                                                                                      |
| Int59-donor            | Amp, Int59- <i>Not I -Nde I</i>                                         |                                                                                                      |
| DetPFK1-donor          | Amp, DetPFK1-HA                                                         | The deletion donor helper plasmids containing an upstream and a downstream homologous arm of ~500 bp |
| DetPYK1-donor          | Amp, DetPYK1-HA                                                         |                                                                                                      |
| Int1-Gh2PS-donor       | Amp, Int1- <i>pTEF1-Gh2PS-t0547</i>                                     | Genes cloned into the integration donor helper plasmids for site-specific integration                |
| Int11-Gh2PS-donor      | Amp, Int11- <i>pTEF1-Gh2PS-t0547</i>                                    |                                                                                                      |
| Int20-Gh2PS-donor      | Amp, Int20- <i>pTEF1-Gh2PS-t0547</i>                                    |                                                                                                      |
| Int32-Gh2PS-donor      | Amp, Int32- <i>pTEF1-Gh2PS-t0547</i>                                    |                                                                                                      |
| Int33-Gh2PS-donor      | Amp, Int33- <i>pTEF1-Gh2PS-t0547</i>                                    |                                                                                                      |
| Int34-Gh2PS-donor      | Amp, Int34- <i>pTEF1-Gh2PS-t0547</i>                                    |                                                                                                      |
| Int35-CkxPK-donor      | Amp, Int35- <i>pGAP-CkxPK-tAOX1</i>                                     |                                                                                                      |
| Int39-ScACC1*-donor    | Amp, Int39- <i>pTEF1-ScACC1*-tAOX1</i>                                  |                                                                                                      |
| Int56-SsXR-SsXDH-donor | Amp, Int56- <i>pTEF1-SsXDH-t0547-pGAP-SsXR-tAOX1</i>                    |                                                                                                      |
| Int1-SsXKS-donor       | Amp, Int1- <i>pTEF1-SsXKS-tAOX1</i>                                     |                                                                                                      |
| Int59-LmPTA-donor      | Amp, Int59- <i>pAOX1-LmPTA-tAOX1</i>                                    |                                                                                                      |

**Table S2. List of Primers Used in This Study.**

| Primers                   | Sequences (5'-3')                                          |
|---------------------------|------------------------------------------------------------|
| sgRNA-Int1-F <sup>1</sup> | ACGCTATCTGAAGTATTTACTGGG                                   |
| sgRNA-Int1-R              | AAACCCAGTAAATACTTCAGATA                                    |
| sgRNA-Int11-F             | ACGCTATTAAAAAGACGATCCCG                                    |
| sgRNA-Int11-R             | AAACCGGGATCGTCTTTTTTAATA                                   |
| sgRNA-Int20-F             | ACGCAGAAGAAAATGCGAAACAGG                                   |
| sgRNA-Int20-R             | AAACCTGTTCGTCATTTTCTTCT                                    |
| sgRNA-Int32-F             | ACGCGTGACGAAAGAGATGAGGTG                                   |
| sgRNA-Int32-R             | AAACCACCTCATCTCTTCGTCAC                                    |
| sgRNA-Int33-F             | ACGCCCCGTCATATGAGGACAAAG                                   |
| sgRNA-Int33-R             | AAACCTTTGTCTCATAGTGACGG                                    |
| sgRNA-Int34-F             | ACGCGATCAGTTCATTGATAGACA                                   |
| sgRNA-Int34-R             | AAACTGTCTATCAATGAACTGATC                                   |
| sgRNA-Int35-F             | ACGCACTGATTGCCAGAAGAACA                                    |
| sgRNA-Int35-R             | AAACTGTTCTTCTGGCAAATCAGT                                   |
| sgRNA-Int39-F             | ACGCGATTGAGTAGAGTCCTATTG                                   |
| sgRNA-Int39-R             | AAACCAATAGGACTCTACTGAATC                                   |
| sgRNA-Int56-F             | ACGCGAAATGTTGCTCGGTGCGCG                                   |
| sgRNA-Int56-R             | AAACCGCGCACCGAGCAACATTTC                                   |
| sgRNA-Int59-F             | ACGCAATGATGTCAATCCCATACG                                   |
| sgRNA-Int59-R             | AAACCGTATGGGATTGACATCATT                                   |
| Gh2PS-F                   | TATTCTCACTACATACATTTAGTTATTCGCCAACGATGG-GAAGTTACTCTAGCGATG |
| Gh2PS-R                   | TTAGTTTGTCTTAAACTAAGCGAACTACGTACGTCAATTCCCATTTCG-TACAGCTG  |

|                           |                                                                    |
|---------------------------|--------------------------------------------------------------------|
| <i>ScACC1*-F</i>          | TTTATTCTCACTACATACATTTTAGTTATTTCGCCAACATGAGCGAAGAAA-GCTTATTC       |
| <i>ScACC1*-R</i>          | GGCAAATGGCATTCTGACATCCTCTTGATTAGAATCTAG-TCATTTCAAAGTCTTCAAC        |
| <i>SsXR-F</i>             | CAATTGAACAACATCAAAACACACATGCCTTCTATTAAGTTGAACTCTG                  |
| <i>SsXR-R</i>             | AATGGCATTCTGACATCCTCTTGAATTAGACGAAGATAGGAATCTTGTCC                 |
| <i>SsXDH-F</i>            | CATACATTTTAGTTATTTCGCCAACAAATGACTGCTAACCCCTCCTTG                   |
| <i>SsXDH-R</i>            | TAAACTAAGCGAAACTACGTACGCATTACTCAGGGCCGTCAATGA                      |
| <i>SsXKS-F</i>            | ACATACATTTTAGTTATTTCGCCAACATGACCACTACCCCATTTGA                     |
| <i>SsXKS-R</i>            | TGACATCCTCTTGATTAGAATCTAGTTAGTGTTCATTCACCTTCCATCT                  |
| <i>CkxPK-F</i>            | TCAATTGAACAACATCAAAACACACAATGGCTGATTTGACTCAAA                      |
| <i>CkxPK-R</i>            | TTGAAGTGAAAAAAGAAATGCACGACTTATGCAAATTAGCATCTCAC-TTAATCTTCTGT       |
| <i>LmPTA-F</i>            | ACATACATTTTAGTTATTTCGCCAACGCATGAAGCTAATGGAAAACATCTTC               |
| <i>LmPTA-R</i>            | TAAACTAAGCGAAACTACGTACGCTTATTAGCCTTGCGCTTGC                        |
| <i>Int1-Gh2PS-F</i>       | TACTTCTTTTGCAACGTAAATACTAGTCTAAAAGCTCAAGGAGATTCAGAGGAG-TTG         |
| <i>Int1-Gh2PS-R</i>       | GCCTTAAAGGAAATTTGGAAGTCCAGTGCCACTTTCGCTAGGGTTGTTCCGTTAG-CAC        |
| <i>Int11-Gh2PS-F</i>      | ATTAAATTTGGCAATTCCTCTAACATGCCATGGGATCAAGGAGATTCAGAGGAG-TTG         |
| <i>Int11-Gh2PS-R</i>      | TGATATGAGAAGCAAACAAGATTTATAGACAGATTAGCTAGGGTTGTTCCGTTAG-CAC        |
| <i>Int20-Gh2PS-F</i>      | AAGTTTTTTATGAGACGATGATTTCGAAAGGTTCTACAAGGAGATTCAGAGGAG-TTG         |
| <i>Int20-Gh2PS-R</i>      | AGCCCTCTTGGAGCTGTGTTATTTACTATTGAGGAAGCTAGGGTTGTTCCGTTAG-CAC        |
| <i>Int33-Gh2PS-F</i>      | ACCCACATTTTCCTCCTAGCACGTGAATCTTTTAAACAAGGAGATTCAGAGGAG-TTG         |
| <i>Int33-Gh2PS-R</i>      | TCTAACTAGTTTGCCGCGACCACCATACAATATTTAGCTAGGGTTGTTCCGTTAG-CAC        |
| <i>Int34-Gh2PS-F</i>      | GAAGCAAAAATGACTGTAATCCTTATACGGCTGATTCAAGGAGATTCAGAG-GAGTTG         |
| <i>Int34-Gh2PS-R</i>      | GTACATTTAATCATGTGTTTTAAACTGATGATGAAGCTAGGGTTGTTCCGTTAG-CAC         |
| <i>Int35-CkxPK-donor</i>  | GTCATCTTCCTTGCTTTTCGTCTTATTCGATGCTACTAATTGCCTGCTACTCTGGTCCC        |
| <i>Int35-CkxPK-donor</i>  | ATCTCCACATATCAAGGAATTATCATAACCAGTCTCTTTTCATCTCAC-TTAATCTTCTGTACTCT |
| <i>Int39-ScACC1*-F</i>    | TGCCCAGCAGGACATTGAAAAAGCAG                                         |
| <i>Int39-ScACC1*-R</i>    | AGCAGCTGGAGCAGAAGAGGAAG                                            |
| <i>Int56-SsXR-SsXDH-F</i> | GAACTTCCATAGGACTTTCTGCA                                            |
| <i>Int56-SsXR-SsXDH-R</i> | GAGCTCGTGGTATTCAACCCA                                              |
| <i>Int1-SsXKS-F</i>       | GTCCATACTTCTTTTGCAACGTAAATACTAGTCTAAAAGCCAA-TAACTGTCGCCTCTTTTATCTG |
| <i>Int1-SsXKS-R</i>       | TCAGGCCTTAAAGGAAATTTGGAAGTCCAGTGCCACTTTCGCTCTCAC-TTAATCTTCTGTACTC  |
| <i>Int59-LmPTA-donor</i>  | TCCAATCAGGGGTTGAGTGA                                               |
| <i>Int59-LmPTA-donor</i>  | GGTCAAAGACTTAAGACCGC                                               |

Note:

<sup>1</sup> IntX refers to the genomic integration site of *P. pastoris*.

**Table S3. List of Gene Coding Sequences Used in This Study.**

| Gene           | Sequences (5'-3')                                                                                                                                                                                                                                                                                                                                                                                                                                                                                                                                                                                                                                                                                                                                                                                                                                                                                                                                                                                                                                                                                                                                                                                                                                                                                                                                                                                                                           |
|----------------|---------------------------------------------------------------------------------------------------------------------------------------------------------------------------------------------------------------------------------------------------------------------------------------------------------------------------------------------------------------------------------------------------------------------------------------------------------------------------------------------------------------------------------------------------------------------------------------------------------------------------------------------------------------------------------------------------------------------------------------------------------------------------------------------------------------------------------------------------------------------------------------------------------------------------------------------------------------------------------------------------------------------------------------------------------------------------------------------------------------------------------------------------------------------------------------------------------------------------------------------------------------------------------------------------------------------------------------------------------------------------------------------------------------------------------------------|
| <i>Gh2PS</i>   | <p>ATGGGAAGTTACTCTAGCGATGATGTGGAGGTTATTCGAGAGGCCGG-<br/> TAGAGCCCAGGGCTTAGCGACCATACTTGCGATTGGCACCGCTACTCCACCGAATTCTGT<br/> AGCGCAAGCCGACTATGCGGATTACTATTTTCGAGTCACTAAATCAGAGCACATGGTG-<br/> GAT-<br/> TTAAAGGAGAAATTCAAACGAATTTGTGAAAAGACGGCGATCAAGAAACGGTATCTGGC<br/> GTTGACGGAGGACTACCTACAAGAGAATCCAAC-<br/> GATGTGCGAATTCATGGCCCCTTCTCTAAACGCTCGCCAGGACCTTGTCGTGACTGGCGT<br/> ACCAATGCTCGGTAAAGAGGGCAGCCGTAAAGGCCATAGACGAATGGGGATTACCCAA-<br/> GAG-<br/> TAAAATCACCCACCTAATTTTTTTGTACAACGGCAGGGGTTCGATATGCCGGGGGCAGATTA<br/> CCAGCTGGTCAAGCTGCTTGGGTTGAGCCCATCCGTAAAGCGTTACATGTTGTATCAG-<br/> CAGGGTTGCGCTGCCGGGGTACTGTTTTACGCTTGGCCAAAGATCTTGCGGAGAACAA<br/> CAAGGGTAGTAGGGTCCTCATCGTGTGCTCCGAAATTACTGCGATACTCTTTCAC-<br/> GGACCCAACGAAAATCATCTCGACTCACTTGTCGCTCAAGCCCTGTTCCGGTGACGGGGC<br/> AGCTGCCCTTATAGTGGGTTCCGGGACCGCACCTAGCTGTTGAGCGCCCTATCTTCGA-<br/> GATTGTATCAACGGACCAGACAATATTGCCGGATACAGAGAAGGCAATGAAATTACATCT<br/> CCGGGAGGGGGGATTAACCTTTCAACTTCATCGGGATGTGCCCTCATGGTCG-<br/> CAAAAAACATCGAAAACGCTGCTGAAAAAGCATTGTCCCCTCTAGGTATTACCGACTGG<br/> AATTCTGTGTTTTGGATGGTCCATCCCGGCGGCCGTGCAATACTAGAC-<br/> CAAGTAGAAAGGAACTCAATTTAAAGGAAGACAAGCTTAGGGCGTCGCGTCATGTGCT<br/> GTCAGAATATGGGAACCTGATATCGGCGTGTGTACTCTTCATCATCGATGAAGTAC-<br/> GGAAAA-<br/> GAAGTATGGCTGAAGGAAAGAGCACTACGGGCGAGGGGTTAGACAGCGGCGTTTTGTTT<br/> GGATTCGGACCTGGCATGACCGTTGAAACAGTTGTACTAAGGTCGGTTAGAGTGACAG-<br/> CAGCTGTAGCAAATGGGAATTGA</p>            |
| <i>ScACC1*</i> | <p>ATGAGCGAAGAAAGCTTATTCGAGTCTTCTCCACAGAAGATGGAGTAC-<br/> GAAATTACAAAC-<br/> TACTCAGAAAGACATACAGAACTTCCAGGTCATTTTCATTGGCCTCAATACAGTAGATAAA<br/> CTAGAGGAGTCCCCGTTAAGGGACTTTGTAAAGAGTCACGGTGGTCACACGGTCATA-<br/> TCCAA-<br/> GATCCTGATAGCAAATAATGGTATTGCCGCCGTGAAAGAAATTAGATCCGTCAGAAAATG<br/> GGCATAACGAGACGTTCCGGCGATGACAGAAC-<br/> CGTCCAATTCGTCGCCATGGCCACCCCAGAA-<br/> GATCTGGAGGCCAACGCAGAATATATCCGTATGGCCGATCAATACATTGAAGTGCCAGGT<br/> GGTACTAATAATAACAACACTACGCTAACGTAGACTTGATCGTAGACATCGCCGAAAGAG-<br/> CAGACGTAGACGCCGTATGGGCTGGCTGGGGTCACGCCTCCGAGAATCCACTATTGCCTG<br/> AAAAATTGTCCCAGTCTAAGAGGAAAGTCATCTTTATTGGGCCTCCAGGTAAC-<br/> GCCATGAGGTCTTTAGGTGATAAAATCTCCTCTACCATTGTGCTCAAAGTGCTAAAGTCC<br/> CATGTATTCCATGGTCTGGTACCGGTGTTGACACCGTTCACGTGGACGAGAAAAC-<br/> CGGTCTGGTCTCTGTGACGATGACATCTATCAAAGGGTTGTTGTACCTCTCCTGAAGAT<br/> GGTTACAAAAGGCCAAGCGTATTGGTTTTCTGTGTCATGAT-<br/> TAAGGCATCCGAAGGTGGTGGTAAAGGTATCAGACAAGTTGAACGTGAAGAAGATT<br/> TCATCGCTTTATACCACCAGGCAGCCAAC-<br/> GAAATTCAGGCTCCCCATTTTCATCATGAAGTTGGCCGGTAGAGCGCGTCACTTGGA<br/> GTTCAACTGCTAGCAGATCAGTACGGTACAAATATTTCTTGTTCGGTAGA-<br/> GACTGTTCCGTTGAGAGACGTCATCAAAAAATTATCGAAGAAGCACCAGTTACAATTGCC<br/> AAGGCTGAAACATTTACGAGATGGAAGGGCTGCCGTCAGACTGGGGAACTAG-<br/> TCGGTTATGTCTCTGCCGGTACCGTGGAGTATCTATTTCTCATGATGATGGAATTTCTAC<br/> TTTTTAGAATTGAACCAAGATTACAAGTCGAGCATCCAACAAC-<br/> GGAAATGGTCTCCGGTGTTAACTTACCTGCAGCTCAATTACAAATCGCTATGGGTATCCCT</p> |

ATGCATAGAATAAGTGACATTAGAACCTTTATATGG-  
 TATGAATCCTCATTCTGCCTCAGAAATCGATTTTGAATTCAAAACTCAAGATGCCACCAA  
 GAAACAAAGAAGACCTATTCCAAAGGGTCATTGTACCGCTTGTCTGATCACATCAGAA-  
 GATCCAAACGATGGATTCAAGCCATCGGGTGGTACTTTGCATGAACTAAACTTCCGTTCTT  
 CCTCTAATGTTTGGGGTACTTCTCCGTGGGTAACAATGGTAATATTCACCTCCTTTTCG-  
 GACTCTCAGTTCGGCCATATTTTTGCTTTTGGTGAAAATAGACAAGCTTCCAGGAAACAC  
 ATGGTTGTTGCCCTGAAGGAATTGTCCATTAGGGGTGATTTCAGAACTACTGTGGAA-  
 TACTT-  
 GATCAAACCTTTTGGAAACTGAAGATTTTCGAGGATAACACTATTACCACCGGTTGGTTGGA  
 CGATTTGATTACTCATAAAATGACCGCTGAAAAGCCTGATCCAACTCTTGCCGTCATTT-  
 GCGGTGCCGCTACAAAGGCTTTCTTAGCATCTGAAGAAGCCCCGCCACAAGTATATCGAAT  
 CCTTACAAAAGGGACAAGTTCTATCTAAAGACCTACTGCAAACCTATGTTCCCTGTAGAT-  
 TTTATCCATGAGGGTAAAAGATACAAGTTCACCGTAGCTAAATCCGGTAATGACCGTTAC  
 ACATTATTTATCAATGGTTCTAAATGTGATATCAT-  
 ACTGCGTCAACTAGCTGATGGTGGTCTTTTGATTGCCATAGGCGGTAAATCGCATACCATC  
 TATTGGAAAGAAGAAGTTGCTGCTACAAGATTATCCGTTGACTCTATGACTACTTTGTT-  
 GGAAGTTGAAAACGATCCAACCCAGTTGCGTACTCCATCCCCTGGTAAATTGGTTAAATT  
 CTTGGTGGAATAATGGTGAACACATTATCAAGGGCCAACCATATGCAGAAATT-  
 GAAGTTATGAAAATGCAAATGCCTTTGGTTTCTCAAGAAAATGGTATCGTCCAGTTATTAA  
 AGCAACCTGGTTCTACCATTGTTGCAGGTGATATCATGGCTATTATGACTCTTGAC-  
 GATCCATCCAAGGTCAAGCACGCTCTACCATTTGAAGGTATGCTGCCAGATTTTGGTTCTC  
 CAGTTATCGAAGGAACCAAACCTGCCTATAAATTCAAGTCATTAGTGTCTACTTT-  
 GGAAAACATTTTGAAGGGTTATGACAACCAAGTTATTATGAACGCTTCCTTGCAACAATT  
 GATAGAGGTTTTGAGAAATCCAAAACCTGCCTTACTCAGAATGGAAAC-  
 TACACATCTCTGCTTTACATTCAAGATTGCCTGCTAAGCTAGATGAACAAATGGAAGAGT  
 TAGTTGCACGTTCTTTGAGACGTGGTGTCTGTTTTCCAGCTAGACAATTAAGTAAATT-  
 GATTGATATGGCCGTGAAGAATCCTGAATACAACCCCGACAAATTGCTGGGCGCCGTCGT  
 GGAACCATTGGCGGATATTGCTCATAAGTACTCTAACGGGTAGAAAGCCCATGAACATTC-  
 TA-  
 TATTTGTCCATTTCTTGGAAGAATATTACGAAGTTGAAAAGTTATTCAATGGTCCAAATGT  
 TCGTGAGGAAAATATCATTCTGAAATTGCGTGATGAAAACCCTAAAGATCTAGA-  
 TAAAGTT-  
 GCGCTAACTGTTTTGTCTCATTTCGAAAGTTTCAGCGAAGAATAACCTGATCCTAGCTATCT  
 TGAAACATTATCAACCATTGTGCAAGTTATCTTCTAAAGTTTCTGCCATTTTCTC-  
 TACTCCTCTACAACATATTGTTGAACTAGAATCTAAGGCTACCGCTAAGGTGCTCTACAA  
 GCAAGAGAAATTTTGATTCAAGGCGCTTTACCTTCGGTCAAGGAAA-  
 GAACTGAACAAATT-  
 GAACATATCTTAAAATCCTCTGTTGTGAAGGTTGCCTATGGCTCATCCAATCCAAAGCGCT  
 CTGAACCAGATTTGAATATCTTGAAGGACTTGATCGATTCTAATTACGTT-  
 GTGTTGATGTTTTACTTCAATTCTAACCCTCAAGACCCAGTTGTGACTGCTGCAGCTG  
 CTCAAGTCTATATTCGTCGTGCTTATCGTGCTTACACCATAGGAGATATTAGAGTTCAC-  
 GAAGGTGTACAGTTCCAATTGTTGAATGGAAATTCAACTACCTTCAGCTGCGTTCTCC  
 ACCTTTCCAACCTGTAAATCTAAAATGGGTATGAACAGGGCTGTTGCTGTTTCAGATTT-  
 GTCATATGTTGCAAACAGTCAGTCATCTCCGTTAAGAGAAGGTATTTTGATGGCTGTGGAT  
 CATTTAGATGATGTTGATGAAATTTTGTACAAAGTTTGAAGTTATTCTCTGTCAC-  
 CAATCTTCTTCTAACGGACCTGCTCCTGATCGTTCTGGTAGCTCCGCATCGTTGAGTAATG  
 TTGCTAATGTTTGTGTTGCTTCTACAGAAGGTTTTCGAATCTGAAGAGGAAATTTTGG-  
 TAAGGTTGAGAGAAATTTGGATTGAATAAGCAGGAATTAATCAATGCTTCTATCCGTCG  
 TATCACATTTATGTTCCGTTTTAAAGATGGGTCTTATCCAAAGTATTATACTTTTAAC-  
 GGTCCAAATTATAACGAAAATGAAACAATTCGTCACATTGAGCCGGCTTTGGCCTTCCAA  
 CTGGAATTAGGAAGATTGTCCAACCTCAACATTAAACCAATTTTCACTGATAA-  
 TAGAAACATCCATGTCTACGAAGCTGTTAGTAAGACTTCTCCATTGGATAAGAGATTCTTT

ACAAGAGGTATTATTAGAACGGGTCATATCCGTGATGACATTTCTATTCAAGAA-  
 TATCTGACTTCTGAAGCTAACAGATTGATGAGTGATATATTGGATAATTTAGAAGTCACCG  
 ACACCTCAAATTCTGATTTGAATCATATCTTCATCAACTTCATTGCGGTGTTTGA-  
 TATCTCTCCAGAAGATGTCTGAAGCCGCCTTCGGTGGTTTCTTAGAAAGATTTGGTAAGAG  
 ATTGTTGAGATTGCGTGTTTCTTCTGCCGAAATTAGAATCATCATCAAA-  
 GATCCTCAAACAGGTGCCCCAGTACCATTGCGTGCCTTGATCAATAACGTTTCTGGTTATG  
 TTATCAAAACAGAAATGTACACCGAAGTCAAGAACGCAAAAGGTGAATGGG-  
 TATTTAAGTCTTTGGGTAAACCTGGATCCATGCATTTAAGACCTATTGCTACTCCTTACCCT  
 GTTAAGGAATGGTTGCAACCAAAACGTTATAAGGCACACTTGATGGGTACCACAT-  
 ATGTC-  
 TATGACTTCCCAGAATTATTCCGCCAAGCATCGTCATCCCAATGGAAAAATTTCTCTGCAG  
 ATGTTAAGTTAACAGATGATTTCTTTATTTCCAACGAGTTGATTGAAGATGAAAAC-  
 GGCGAATTAAGTGAAGGTGGAAAGAGAACCTGGTGCCAACGCTATTGGTATGGTTGCCTTT  
 AAGATTACTGTAAAGACTCCTGAATATCCAAGAGGCCGTCAATTTGTTGTTGTTGCTAAC-  
 GA-  
 TATCACATTCAAGATCGGTTCCCTTTGGTCCACAAGAAGACGAATTCTTCAATAAGGTTACT  
 GAATATGCTAGAAAGCGTGGTATCCCAAGAATTTACTTGGCTG-  
 CAAACTCAGGTGCCAGAATTGGTATGGCTGAAGAGATTGTTCCACTATTTCAAGTTGCAT  
 GGAATGATGCTGCCAATCCGGACAAGGGCTTCCAA-  
 TACTTATACTTAACAAGTGAAGGTATGGAACTTTAAAGAAATTTGACAAAGAAAATTCT  
 GTTCTCACTGAACGTACTGTTATAAACGGTGAAGAAAGATTTGTCATCAAGA-  
 CAATTATTGGTTCTGAAGATGGGTAGGTGTCTACGTGGATCTGGTTTAATTGCT  
 GGTGCAACGTCAAGGGCTTACCACGATATCTTCACTATCACCTTAGTCACTT-  
 GTAGATCCGTCCGTATCGGTGCTTATTTGGTTCGTTTGGGTCAAAGAGCTATTCAGGTCTGA  
 AGGCCAGCCAATTATTTAACTGGTGCTCCTGCAATCAACAAAATGCTGGGTAGA-  
 GAAGTTTATACTTCTAACTTACAATTGGGTGGTACTCAAATCATGTATAACAACGGTGTTT  
 CACATTTGACTGCTGTTGACGATTTAGCTGGTGTAGAGAAGATTGTT-  
 GAATGGATGTCTTATGTTCCAGCCAAGCGTAATATGCCAGTTCCTATCTTGAAACTAAAG  
 ACACATGGGATAGACCAGTTGATTTCACTCCAATAATGATGAACTTACGATGTAA-  
 GATGGATGATTGAAGGTCGTGAGACTGAAAGTGGATTGAATATGGTTTGTGTTGATAAAG  
 GGTCTTTCTTTGAAACTTTGTCAGGATGGGCCAAAGGTGTTGTCGTTGG-  
 TAGAGCCCGTCTT-  
 GGTGGTATTCCACTGGGTGTTATTGGTGTGAAACAAGAACTGTCTGAGAACTTGATTCCT  
 GCTGATCCAGCTAATCCAAATAGTGCTGAAACATTAATTCAAGAACCTGGTCAAGTTTGG-  
 CATCCAAACTCCGCCTTCAAGACTGCTCAAGCTATCAATGACTTTAACAACGGTGAACAA  
 TTGCCAATGATGATTTTGGCCAACCTGGAGAGGTTTCTCTGGTGGTCAACGTGA-  
 TATGTTCAACGAAGTCTTGAAGTATGGTTCGTTTATTGTTGACGCATTGGTGGATTACAAA  
 CAACCAATTATTATCTATATCCCACCTACCGGTGAACTAAGAGGTGGTTCATGGGTGTT-  
 GTCGATCCAACTATCAACGCTGACCAAAATGGAAATGTATGCCGACGTCAACGCTAGAGCT  
 GGTGTTTTGGAACCACAAGGTATGGTTGGTATCAAGTTCCGTAGAGAAAAATTGCTG-  
 GACAC-  
 CATGAACAGATTGGATGACAAGTACAGAGAATTGAGATCTCAATTATCCAACAAGAGTTT  
 GGCTCCAGAAGTACATCAGCAAATATCCAAGCAATTAGCTGATCGTGAGAGAGAAC-  
 TATTGCCAATTACGGACAAATCAGTCTTCAATTTGCTGATTTGCACGATAGGTCTTCAGG  
 TATGGTGGCCAAGGGTGTATTTCTAAGGAACTGGAATGGACCGAGGCAC-  
 GTCGTTTCTTCTTCTGGAGATTGAGAAGAAGATTGAACGAAGAATATTTGATTAAAAGGT  
 TGAGCCATCAGGTAGGCGAAGCATCAAGATTAGAAAAGATCGCAAGAATT-  
 AGATCGTGG-  
 TACCCTGCTTCAGTGGACCATGAAGATGATAGGCAAGTCGCAACATGGATTGAAGAAAA  
 CTACAAAACCTTTGGACGATAAACTAAAGGGTTTGAAATTAGAGTCATTTCGCTCAA-  
 GACTTAGCTAAAAAGATCAGAAGCGACCATGACAATGCTATTGATGGATTATCTGAAGTT  
 ATCAAGATGTTATCTACCGATGATAAAGAAAAATTGTTGAAGACTTTGAAATGA

|              |                                                                                                                                                                                                                                                                                                                                                                                                                                                                                                                                                                                                                                                                                                                                                                                                                                                                                                                                                                                                                                                                                                                                                                                                                                                                                                                                                                                                                                                                                                                                                                                                                                                                                                                                                                                                                                                                                                                                                                                                                                                                                                                                                                                                                                                                                                                                                                                                                                                                                                                                                                                                                                                                                                                                                                                                                               |
|--------------|-------------------------------------------------------------------------------------------------------------------------------------------------------------------------------------------------------------------------------------------------------------------------------------------------------------------------------------------------------------------------------------------------------------------------------------------------------------------------------------------------------------------------------------------------------------------------------------------------------------------------------------------------------------------------------------------------------------------------------------------------------------------------------------------------------------------------------------------------------------------------------------------------------------------------------------------------------------------------------------------------------------------------------------------------------------------------------------------------------------------------------------------------------------------------------------------------------------------------------------------------------------------------------------------------------------------------------------------------------------------------------------------------------------------------------------------------------------------------------------------------------------------------------------------------------------------------------------------------------------------------------------------------------------------------------------------------------------------------------------------------------------------------------------------------------------------------------------------------------------------------------------------------------------------------------------------------------------------------------------------------------------------------------------------------------------------------------------------------------------------------------------------------------------------------------------------------------------------------------------------------------------------------------------------------------------------------------------------------------------------------------------------------------------------------------------------------------------------------------------------------------------------------------------------------------------------------------------------------------------------------------------------------------------------------------------------------------------------------------------------------------------------------------------------------------------------------------|
| <i>CkxPK</i> | <p>ATGGCTGATTTCTGACTCAAAGGAATACTTAGAATTGGTTGATAAATGGTGGAGAGCTACT-A-<br/> ACTACTTGTCCGCTGGTATGATCTTCTTGAAGTCAAACCCATTATTTTCCGTTACTAACACA<br/> CCTATCAAGGCTGAAGATGTTAAAGTCAAGCCAATTGGTCATTGGGGTACTA-<br/> TATCTGGTCAAACATTCTTGTATGCTCACGCAAACAGATTGATTAACAAATACGGTTTGAA<br/> TATGTTTTACGTTGGTGGTCCAGGTCATGGTGGTCAAGTAATGGTTACAAACGCTTACTT-<br/> GGATGGTGCATATACCGAAGACTACCCTGAAATTACTCAAGATATCGAGGGTATGAGTCA<br/> TTTGTTTAAAGATTCTCTTTCCAGGTGGTATTGGTTCACATATGACTGCTCAAACAC-<br/> CTGGTTCATTGCACGAAGGTGGTGAATTGGGTATTCTTAAGTCATGCCTTCGGTGCTGT<br/> TTTAGATAATCCAGACCAAGTCGCCTTTGCTGTTGTCGGTGACGGTGAA-<br/> GCAGAAACAGGTCCTTCTATGGCCTCATGGCACTCCATAAAATTTTGAATGCCAAGAAC<br/> GATGGTGCTGTTTTACCAGTCTT-<br/> GGACTTAAATGGTTTCAAATCTCTAACCTACAATTTTAGTAGAATGTCTGATGAAGAA<br/> ATAACCAAGTTTTTCGAAGGTTTGGGTACTACCAAGATTCATTGAAAAC-<br/> GATGACATCCATGATTATGCAACTTACCACCAATTGGCTGCAAACATCTGGATCAAGCT<br/> ATCGAAGACATCCAAGCAATCCAAAATGATGCCAGAGAAAACGGTAAATACCAAGAC-<br/> GGTGAAATACCAGCCTGGCCTGTTATTATAGCTAGATTGCCAAAGGGTGGGGTGGTCCT<br/> ACACATGATGCATCCAATAACCCAATCGAAAATAGTTTTAGAGCCCATCAAGTTCCATT-<br/> GCCTTTAGAACAACACGATTTGGCAACTTACCAGAATTCGAAGACTGGATGAACTCTTA<br/> CAAGCCTGAAGAATTGTTAATGCTGATGGTTCATTGAAAGAC-<br/> GAATTAAAGGCAATCGCCCCAAAAGGTGACAAGAGAATGTCCGCCAATCCTATTACAAA<br/> CGGTGGTGCTGATAGAAGTGACTTGAAGTTACCAAACCTGGAGAGAATTCGCAAACGATA-<br/> TAAACGATGACACTAGAGGTAAAGAATTCGCTGATTCAAAGAGAAACATGGACATGGCA<br/> ACATTGTCTAACTACTTAGGTGCCGTTTCACAATTGAATCCAACCAGATTGAGAT-<br/> TTTTCGGTCTGATGAACTATGTCCAATAGATTGTGGGGTTTGTTAATGTACCCCTAG<br/> ACAATGGATGGAAGAAATTAAAGAACCACAAGATCAATTGTTGTCTCCTACTGG-<br/> TAGAATCATTGACTCACAATTATCCGAACATCAAGCAGAAGGTTGGTTGGAAGGTTATAC<br/> CTTAAGTGGTAGAGTCGGTATTTTCGCTAGTTACGAATCATTTTTGAGAGTAGTTGATAC-<br/> CATGGTAACTCAACATTTCAAGTGGTTGAGACACGCTTCTGAACAAGCATGGAGAAACG<br/> ATTACCCATCCTTGAACCTAATAGCCACAAGTACCGCTTTCCAACAA-<br/> GATCATAATGGTTACACACACCAAGACCCAGGCATGTTGACCCATTTGGCAGAAAAGAA<br/> ATCTAACTTCATCAGAGAATATTTGCCTGCTGATGGTAACTCTTTGTTAGCTGTACAA-<br/> GAAA-<br/> GAGCATTTTCAGAAAGACATAAGGTTAATTTGTTGATCGCTTCTAAGCAACCTAGACAAC<br/> AATGGTTCCTGTAGAAGAAGCAGAAGTTTTGGCCAACGAAGGTTTAAAAA-<br/> TAATCGATTGGGCATCTACTGCCCCATCTTCAGATGTTGACATTACATTGCTTCAGCAGG<br/> TACAGAACCTACCATAGAACTTTGGCCGCTTTGTGGTTAATCAATCAA-<br/> GCATTTCCAGATGTCAAGTTTAGATACGTAAACGTCGTAGAATTGTTGAGATTGCAAAAG<br/> AAATCTGAACCTAACATGAACGATGAAAGAGAATTAAGTGCTGAAGAATTCAA-<br/> TAAGTACTTCCAAGCAGACACACCAGTTATTTTCGGTTTTTCATGCTTACGAAAACCTTAATC<br/> GAATCATTTTTCTTTGAAAGAAAGTTTACTGGTGACGTCTATGTACACGGTTACAGAGAA-<br/> GATGGTGACATTACTACAACCTATGATATGAGAGTTTACTCCCATTGACAGATTCCACC<br/> AAGCCAAAGAAGCAGCCGAAATCTTGAGTGCTAACGGTAAAATAGATCAAGCTG-<br/> CAGCCGACACTTTCATAGCTAAAATGGATGACACATTGGCAAAGCATTTCAGTTACCA<br/> GAAATGAAGGTAGAGATATCGAAGAATTCATGATTGGACCTGGTCACCATTAAATAA-<br/> TAA</p> |
| <i>LmPTA</i> | <p>ATGAAGCTAATGGAAAACATCTTCGGGCTGGCCAAGGCGGACAAAAAAA-<br/> GATCGTGTT-<br/> GGCGGAAGGCGAAGAGGAGCGTAACATTAGGGCTTCCGAGGAAATAATCAGAGACGGG<br/> ATAGCCGATATAATCCTAGTTGGCTCAGAATCAGTCATTAAGGAAAATGCCGCTAAATTT-<br/> GGCGTGAATCTGGCAGGGGTCGAGATAGTCGATCCAGAAACGTCCTCCAAGACTGCCGG<br/> CTACGCGAACGCTTCTATGAGATCCGTAAAAATAAGGGTGTCACACTAGAAAAAGCG-</p>                                                                                                                                                                                                                                                                                                                                                                                                                                                                                                                                                                                                                                                                                                                                                                                                                                                                                                                                                                                                                                                                                                                                                                                                                                                                                                                                                                                                                                                                                                                                                                                                                                                                                                                                                                                                                                                                                                                                                                                                                                                                                                                                                                                                                                                                                                                                                                                                                                                                                 |



|       |                                                                                                                                                                                                                                                                                                                                                                                                                                                                                                                                                                                                                                                                                                                                                                                                                                                                                                                                                                                                                                                                                               |
|-------|-----------------------------------------------------------------------------------------------------------------------------------------------------------------------------------------------------------------------------------------------------------------------------------------------------------------------------------------------------------------------------------------------------------------------------------------------------------------------------------------------------------------------------------------------------------------------------------------------------------------------------------------------------------------------------------------------------------------------------------------------------------------------------------------------------------------------------------------------------------------------------------------------------------------------------------------------------------------------------------------------------------------------------------------------------------------------------------------------|
|       | GA-<br>TAAAATAGTCCGTGATCCAATTTATTTTGGCACCATGATGGTCAAACCTAGGTGATGCTGAT<br>GGGCTAGTGTCTGGAGCCATTACACAACGGGTGATTTACTAAGGCCAGGCCTG-<br>CAGATCGTTAAGACAGTTCCCGGCGCGAGTGTGGTGTCTCTGTCTTCTTGATGAGTGTTT<br>CTGACTGCGAGTACGGCGAG-<br>GATGGTTTTCTGTTATTCGCTGACTGTGCTGTAAATGTATGCCCCACCGCAGAGGAATTATC<br>TAGCATAGCAATCACAACCGCCGAGACGGCAAAAAACCTTTGTAA-<br>GATCGAGCCCAGAGTCG-<br>CAATGCTATCTTTCTCTACAATGGGTTCCGCGTCCCATGAACTAGTCGACAAAGTGACTAA<br>GGCCACAAAGTTGGCTAAGGAGGCACGTCCCGACTTGGATATCGACGGTGAATT-<br>GCAATT-<br>AGATGCGTCACTAGTAAAGAAAGTAGCTGACCTAAAGGCTCCCGGCTCCAAGGTGGCAG<br>GTAAGGCTAATGTGTTGATTTTCCGGATATACAGGCTGGCAACATAGGGTATAAACTAG-<br>TCCAGCGTTTTGCGAAAGCTGAAGCAATCGGACCCATTTGCCAAGGATTTGCCAAGCCTA<br>TAAACGATTTGAGTAGAGGATGTTCTGTGACGACATTGTAAAGGTCTGTGGCGGTAC-<br>GGCGGTTACAGGCGCAAGCGCAAGGCTAATAA                                                                                                                                                                                                                                                                                    |
| SsXR  | ATGCCTTCTATTAAGTTGAACTCTGGTTACGACATGCCAGCCGTCGGTTTCGGCTGTT-<br>GGAAAGTCGACGTCGACACCTGTTCTGAACAGATCTACCGTGCTATCAAGACCGGTTAC<br>AGATTGTTTCGACGGTGCCGAAGATTACGCCAACGAAAAGTTAGTTGGTGCCGGTGTCAA-<br>GAAGGCCATTGACGAAGGTATCGTCAAGCGTGAAGACTTGTTTCCTTACCTCCAAGTTGTG<br>GAACAACTACCACCACCCAGACAACGTGCAAAAAGGCCTT-<br>GAACAGAACCCTTTCTGACTT-<br>GCAAGTTGACTACGTTGACTTGTTCTTGATCCACTTCCCAGTCACCTTCAAGTTCGTTCCA<br>TTAGAAGAAAAGTACCCACCAGGATTCTACTGTGGTAAGGGTGACAACCTTCGACTAC-<br>GAA-<br>GATGTTCCAATTTTAGAGACCTGGAAGGCTCTTGAAAAGTTGGTCAAGGCCGGTAAGATC<br>AGATCTATCGGTGTTTCTAACTTCCCAGGTGCTTTGCTCTTGGACTTGTTGAGAGGTGC-<br>TAC-<br>CATCAAGCCATCTGTCTTGCAAGTTGAACACCACCCATACTTGCAACAACCAAGATTGAT<br>CGAATTTCGCTCAATCCCGTGGTATTGCTGTAC-<br>CGCTTACTCTTCGTTTCGGTCTCAATCTTTTCGTTGAATTGAACCAAGGTAGAGCTTTGAAC<br>ACTTCTCCATTGTTTCGAGAACGAACTATCAAGGCTATCGCTGCTAAGCACGG-<br>TAAGTCTCCAGCTCAAGTCTTGTTGAGATGGTCTTCCCAAAGAGGCATTGCCATCATTC<br>AAAGTCCAACACTGTCCCAAGATTGTTGAAAACAAGGACGTCAACAGCTTCGACTT-<br>GGAC-<br>GAACAAGATTTTCGCTGACATTGCCAAGTTGGACATCAACTTGAGATTCAACGACCCATGG<br>GACTGGGACAAGATTCCTATCTTCGTCTAA |
| SsXDH | ATGACTGCTAACCCTTCCTTGGTGTGAACAAGATCGACGACATTTTCGTTTCGAACTTAC-<br>GATGCCCCAGAAATCTCTGAACCTACCGATGTCTTCGTCCAGGTCAAGAAAACCGGTATC<br>TGTGGTTCCGACATCCACTTCTACGCCCATGGTAGAATCGGTAACCTTCGTTTTGACCAA-<br>GCCAATGGTCTTGGGTCACGAATCCGCCGGTACTGTTGTCCAGGTGTTAAGGGTGTAC<br>CTCTCTTAAGGTTGGTGACAACGTGCTATCGAACCAGGTATTCCATCCAGAT-<br>TCTCCGAC-<br>GAATACAAGAGCGGTCACTACAACCTTGTGTCTTCACATGGCCTTCGCCGCTACTCCTAAC<br>TCCAAGGAAGGCGAACCACCAACCCACCAGGTAC-<br>CTTATGTAAGTACTTCAAGTCGCCAGAA-<br>GACTTCTTGGTCAAGTTGCCAGACCACGTACGCTTGGAACCTCGGTGCTCTTGTTGAGCCA<br>TTGTCTGTTGGTGTCCACGCCTCCAAGTTGGGTTCCGTGCTTTTCGGCGACTACGTT-<br>GCCGTCTTTGGTGTGCTGCTGTTGGTCTTTTGGCTGCTGCTGTGCGCAAGACCTTCGGTG<br>CTAAGGGTGTATCGTCGTTGACATTTTCGACAACAAGTTGAAGATGGCCAAGGACATT-<br>GGTGCTGCTACTCACACCTTCAACTCCAAGACCGGTGGTTCTGAAGAATTGATCAAGGCT<br>TTCGGTGGTAACGTGCCAAACGTGCTTTTGAATGTACTGGTGTGACCTT-                                                                                                                                                                                                                               |

|       |                                                                                                                                                                                                                                                                                                                                                                                                                                                                                                                                                                                                                                                                                                                                                                                                                                                                                                                                                                                                                                                                                                                                                                                                                                                                                                                                                                                                                                                                                                                                                                                                                                                                                                                                                                                                                                                                                                                                                                                                                                                                                                                                                                                                          |
|-------|----------------------------------------------------------------------------------------------------------------------------------------------------------------------------------------------------------------------------------------------------------------------------------------------------------------------------------------------------------------------------------------------------------------------------------------------------------------------------------------------------------------------------------------------------------------------------------------------------------------------------------------------------------------------------------------------------------------------------------------------------------------------------------------------------------------------------------------------------------------------------------------------------------------------------------------------------------------------------------------------------------------------------------------------------------------------------------------------------------------------------------------------------------------------------------------------------------------------------------------------------------------------------------------------------------------------------------------------------------------------------------------------------------------------------------------------------------------------------------------------------------------------------------------------------------------------------------------------------------------------------------------------------------------------------------------------------------------------------------------------------------------------------------------------------------------------------------------------------------------------------------------------------------------------------------------------------------------------------------------------------------------------------------------------------------------------------------------------------------------------------------------------------------------------------------------------------------|
|       | <p>GTATCAAGTT-<br/> GGGTGTTGACGCCATTGCCCCAGGTGGTCGTTTCGTTCAAGTTGGTAACGCTGCTGGTCC<br/> AGTCAGCTTCCCAATCACCGTTTTCGCCATGAAGGAATTGACTTT-<br/> GTTTCGGTTCTTTCAGA-<br/> TACGGATTCAACGACTACAAGACTGCTGTTGGAATCTTTGACACTAACTACCAAAACGGT<br/> AGAGAAAATGCTCCAATTGACTTTGAACAATTGATCACCCACAGATA-<br/> CAAGTTCAAGGACGC-<br/> TATTGAAGCCTACGACTTGGTCAGAGCCGGTAAGGGTGCTGTCAAGTGTCTCATTGACGG<br/> CCCTGAGTAA</p>                                                                                                                                                                                                                                                                                                                                                                                                                                                                                                                                                                                                                                                                                                                                                                                                                                                                                                                                                                                                                                                                                                                                                                                                                                                                                                                                                                                                                                                                                                                                                                                                                                                                                                                                                                                                         |
| SsXKS | <p>ATGACCACTACCCCATTTGATGCTCCAGATAA-<br/> GCTCTTCCTCGGGTTCGATCTTTGACTCAGCAGTTGAAGATCATCGTCACCGATGAAAA<br/> CCTCGCTGCTCTCAAAACCTACAATGTCGAGTTCTGA-<br/> TAGCATCAACAGCTCTGTCCAGAAGGGTGTCAATTGCTATCAACGACGAAATCAGCAAGG<br/> GTGCCATTATTTCCCCCGTTTACATGTGGTTGGATGCCCTTGACCATGTTTTTGAAGA-<br/> CATGAAGAAGGACGGATTCCCCTTCAACAAGGTTGTTGGTATTTCGGTTCTTGTCAACA<br/> GCACGGTTCGGTATACTGGTCTAGAACGGCCGAGAAGGTCTTGTCCGAATTGGAC-<br/> GCTGAATCTTCGTTATCGAGCCAGATGAGATCTGCTTTCACCTTCAAGCACGCTCCAAAC<br/> TGGCAGGATCACTCTACCGGTAAAGAGCTTGAAGAGTTTCGAAAGAG-<br/> TGATTGGTGCTGATGCCTTGGCTGATATCTCTGGTTCCAGAGCCCATTACAGATTCACAGG<br/> GCTCCAGATTAGAAAGTTGTCTACCAGATTCAA-<br/> GCCCCAAAAGTACAACAGAACTGCTCG-<br/> TATCTCTTTAGTTTCGTCATTTGTTGCCAGTGTGTTGCTTGGTAGAATCACCTCCATTGAAG<br/> AAGCCGATGCTTGTGGAATGAACTTGTACGATATCGAAAAGCGCGAGTTCAACGAA-<br/> GAGCTCTTGGCCATCGCTGCTGGTGTCCACCCTGAGTTGGATGGTGTAGAACAAGACGGT<br/> GAAATTTACAGAGCTGGTATCAATGAGTTGAAGAGAAAGTTGGGTCTGTCAAAC-<br/> CTATAACATACGAAAGCGAAGGTGACATTGCCTCTTACTTTGTCAACAGATACGGCTTCA<br/> ACCCCGACTGTAAAATCTACTCGTTACCCGAGACAATTTGGCCACGATTATCTCGTT-<br/> GCCTTTGGCTCCAAATGATGCTTTGATCTCATTGGGTACTTCTACTACAGTTTTAATTATCA<br/> CCAAGAACTACGCTCCTTCTTCTCAATACCATTGTTTAAACATCCAACCATGCCTGAC-<br/> CAC-<br/> TACATGGGCATGATCTGCTACTGTAAACGGTTCCTTGGCCAGAGAAAAGGTTAGAGACGA<br/> AGTCAACGAAAAGTTCAATGTAGAAGACAAGAAGTCGTGG-<br/> GACAAGTTCAATGAAATCTT-<br/> GGACAAATCCACAGACTTCAACAACAAGTTGGGTATTTACTTCCCACTTGGCGAAATTGT<br/> CCCTAATGCCGCTGCTCAGATCAAGAGATCGGTGTTGAACAGCAAGAACGAAATT-<br/> GTAGAC-<br/> GTTGAGTTGGGCGACAAGAAGTGGCAACCTGAAGATGATGTTTCTTCAATTGTAGAATCA<br/> CAGACTTTGTCTTGTAGATTGAGAACTGGTCCAATGTTGAGCAAGAGTGGAGAT-<br/> TCTTCTGCTTCCAGCTCTGCCTCACCTCAACCAGAAGGTGATGGTACAGATTTGCACAAG<br/> GTCTACCAAGACTTGGTTAAAAAGTTTGGTGACTTGTTCACTGATGGAAAGAAGCAAAC-<br/> CTTTGAGTCTTTGACCGCCAGACCTAACCGTTGTTACTACGTCGGTGGTGCTTCCAACAA<br/> CGGCAGCATTATCCSCAAGATGGGTTCATCTTGGCTCCCGTCAACGGAAAC-<br/> TACAAGGTT-<br/> GACATTCCTAACGCCTGTGCATTGGGTGGTGCTTACAAGGCCAGTTGGAGTTACGAGTGT<br/> GAAGCCAAGAAGGAATGGATCGGATACGATCAGTATATCAACAGATTGTTT-<br/> GAAGTAAGTGACGAGATGAATCTGTTTGAAGTCAAGGATAAATGGCTCGAATATGCCAA<br/> CGGGGTTGGAATGTTGGCCAAGATGGAAAGTGAATTGAAACACTAA</p> |

**Table S4. Comparison of TAL Titer, Yield, Productivity from different carbon sources.**

| <b>Strain</b> | <b>Medium</b> | <b>Titer (g/L)</b> | <b>Yield (g/g)</b> | <b>Volumetric productivity (g/L·h)</b> |
|---------------|---------------|--------------------|--------------------|----------------------------------------|
| PpTAL1        | YPD           | 0.95               | 0.0477             | 0.0133                                 |
| PpTAL2        | YPD           | 0.93               | 0.0467             | 0.0130                                 |
| PpTAL3        | YPD           | 1.07               | 0.0536             | 0.0149                                 |
| PpTAL4        | YPD           | 1.51               | 0.0753             | 0.0209                                 |
| PpTAL5        | YPD           | 2.01               | 0.100              | 0.0279                                 |
| PpTAL6        | YPD           | 2.44               | 0.122              | 0.0339                                 |
| PpTAL7        | YPD           | 2.55               | 0.127              | 0.0354                                 |
| PpTAL8        | YPD           | 2.72               | 0.136              | 0.0378                                 |
| PpTAL10       | SCD           | 0.50               | 0.0251             | 0.00696                                |
| PpTAL11       | SCD           | 0.53               | 0.0266             | 0.00739                                |
| PpTAL10       | SCX           | 0.54               | 0.0271             | 0.00754                                |
| PpTAL11       | SCX           | 0.83               | 0.0413             | 0.0115                                 |
| PpTAL8        | SCM           | 0.021              | 0.00103            | 0.000285                               |
| PpTAL9        | SCM           | 0.057              | 0.00285            | 0.000793                               |
